# Supplementary material for: Clinical evidence of Kelch13-dependent and -independent malaria treatment failure with Artemether-Lumefantrine
Source: Research Square preprint supplement (doi:10.21203/rs.3.rs-6958044/v1), 2025-07-25
Supplement: Supplementary file 1 [file a0afb0b89fe64b0809b05433.pdf]

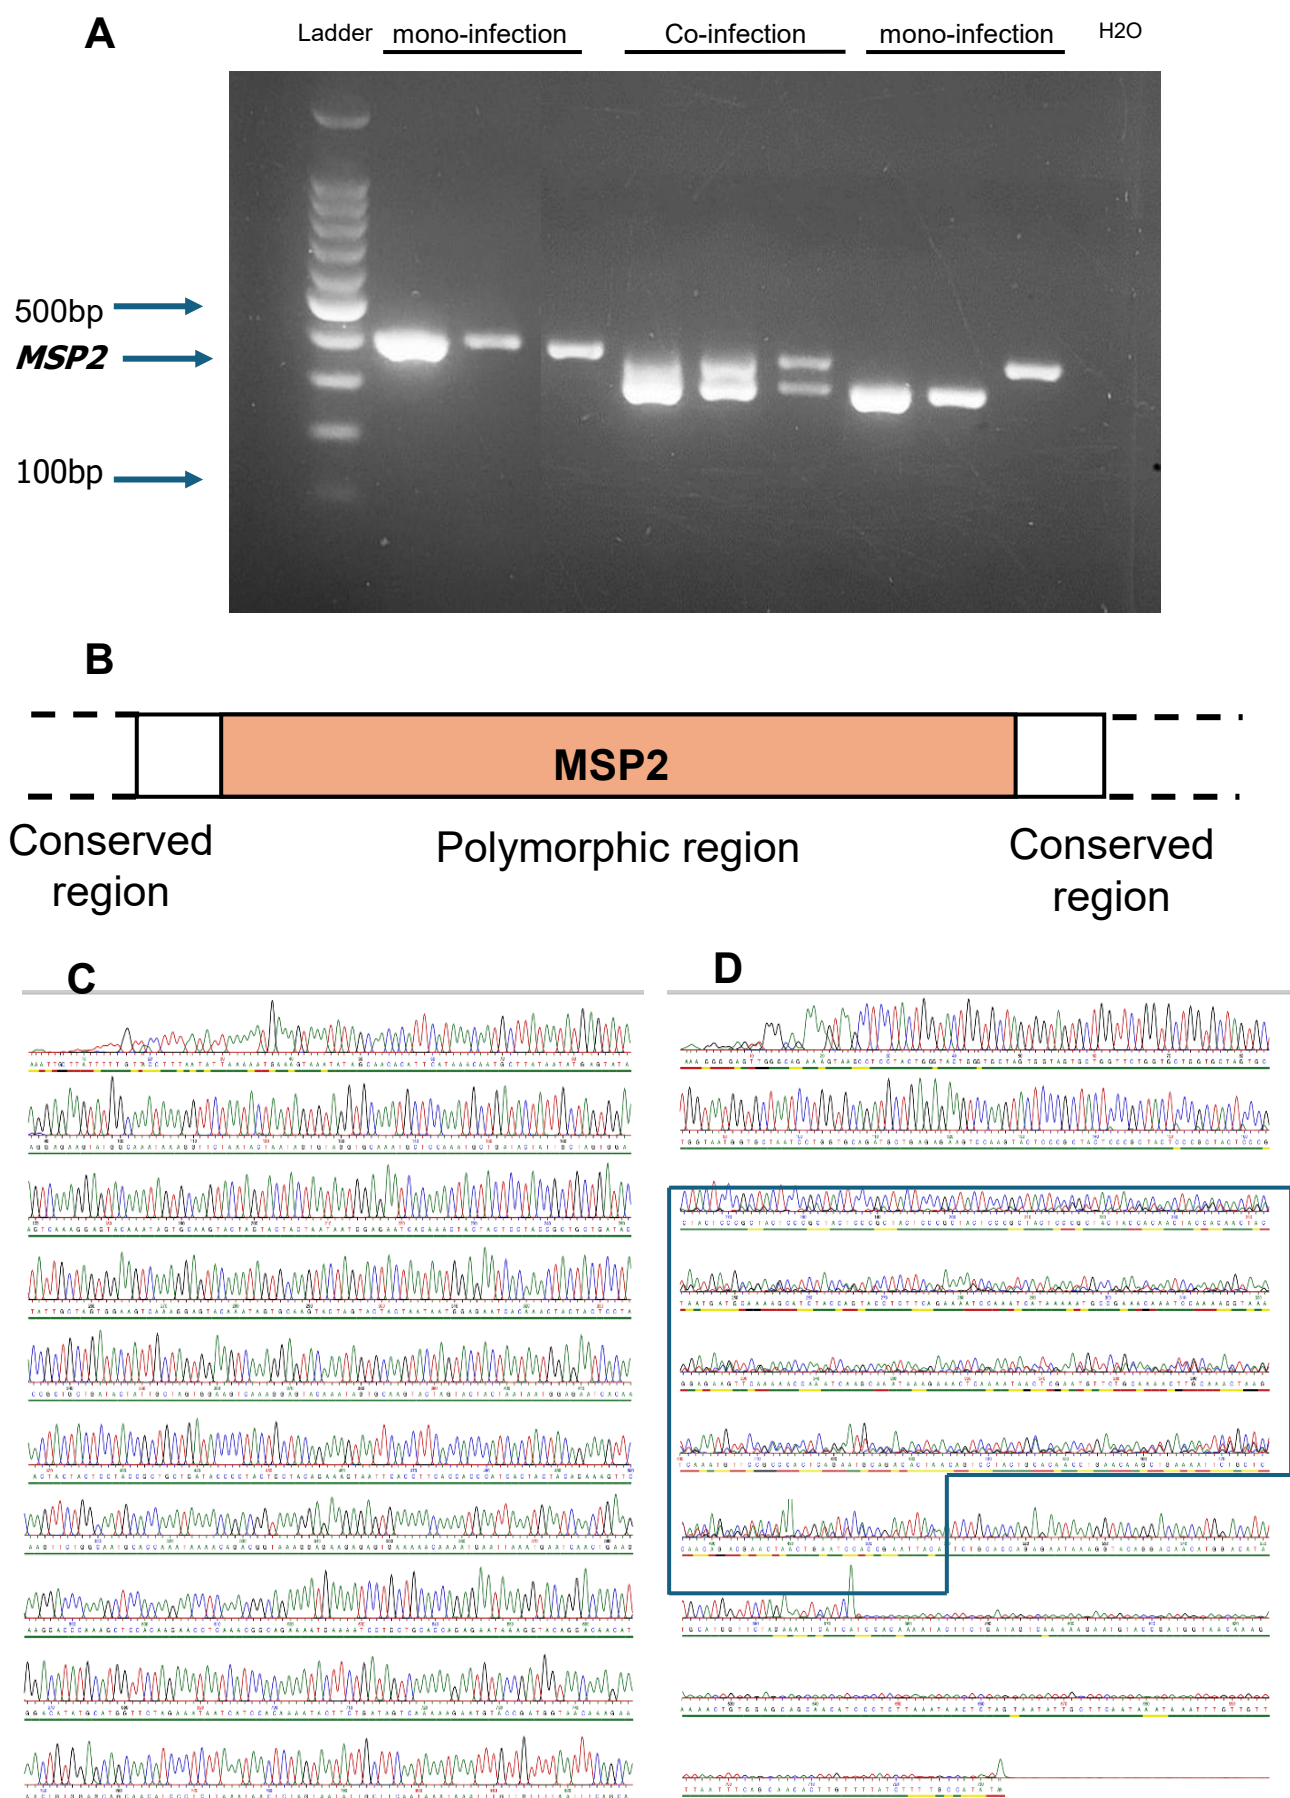

**Figure S1: Sequencing of MSP2 is a good is an efficient approach to discriminate coinfection and mono-infection of *Plasmodium falciparum* in clinical isolates**

**A:** MSP2 gel electrophoresis revealed presence of double bands as sign of co-infection.

**B:** Simplified illustration of MSP2 sequence showing the conserved and polymorphic regions.

Sequencing peaks from Eurofins genomics platform showed high specificity and amplitude of MSP2 gene from mono-infected sample (**C**) as compared to coinfecting samples (**D**) which shows a specific signal at conserved N and C terminals and an unspecific sequencing signal at the variable region.



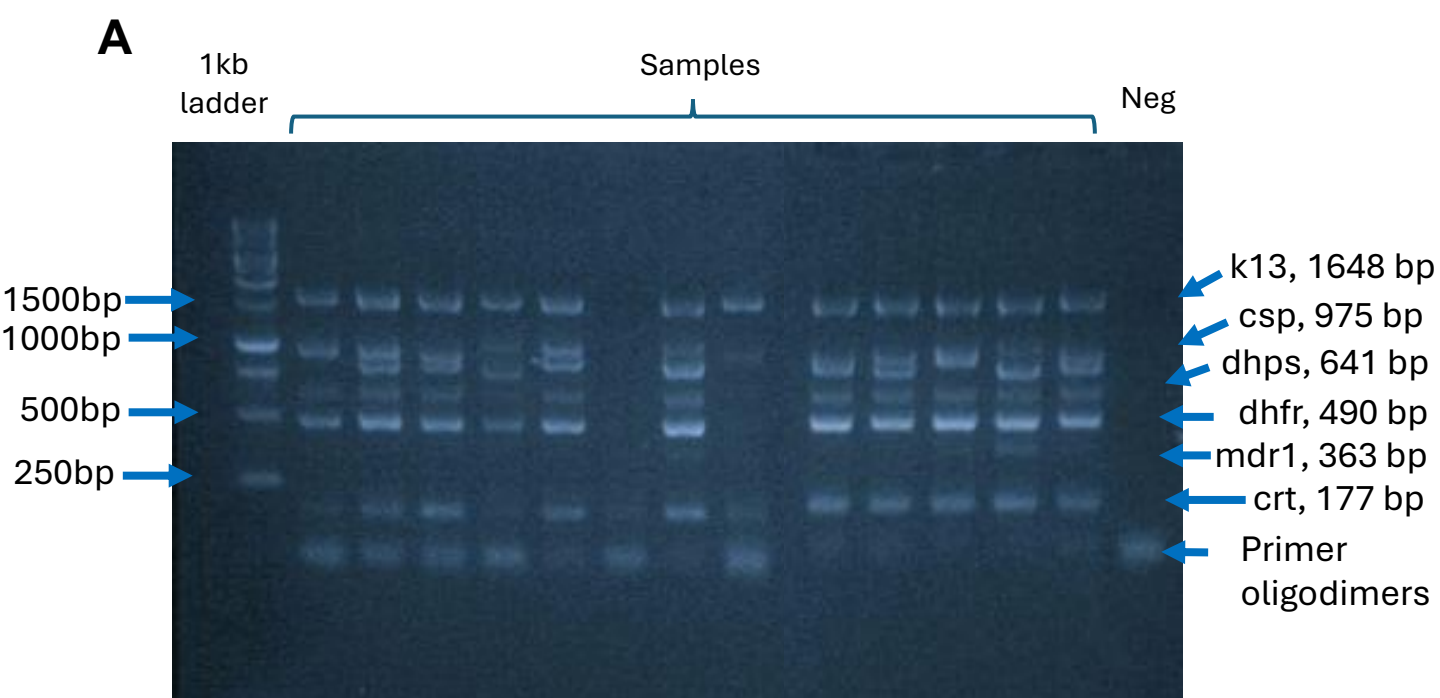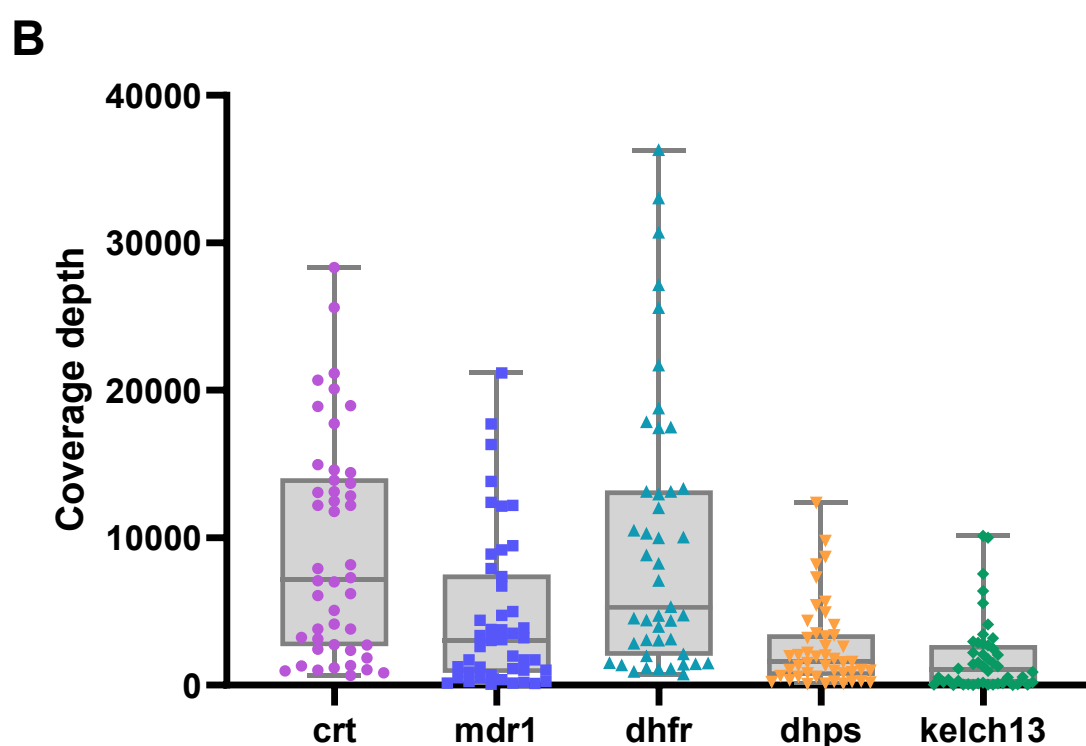

**Figure S3: Agarose gel of targeted sequencing and target coverage depth.**

Multiplex PCR of *crt*, *mdr1*, *dhfr*, *dhps* and *csp* genes and single *kelch13* PCR from all samples before and after treatment (N=46 – 23 samples before treatment; 19 samples after first treatment and 4 samples after second treatment) were performed, PCR product pooled and revealed on agarose gel (**A**). Purified PCR products were used for library preparation using ONT Native Barcoding Kit 24 V14 (SQK-NBD114.24) and final library loaded on Flongle flow cell R.10.4. and run for more than 20 hours. Raw fastq files generated were processed to obtained VCF files. Coverage depth (**B**) of each variant was assessed with cut off point set at 20X.

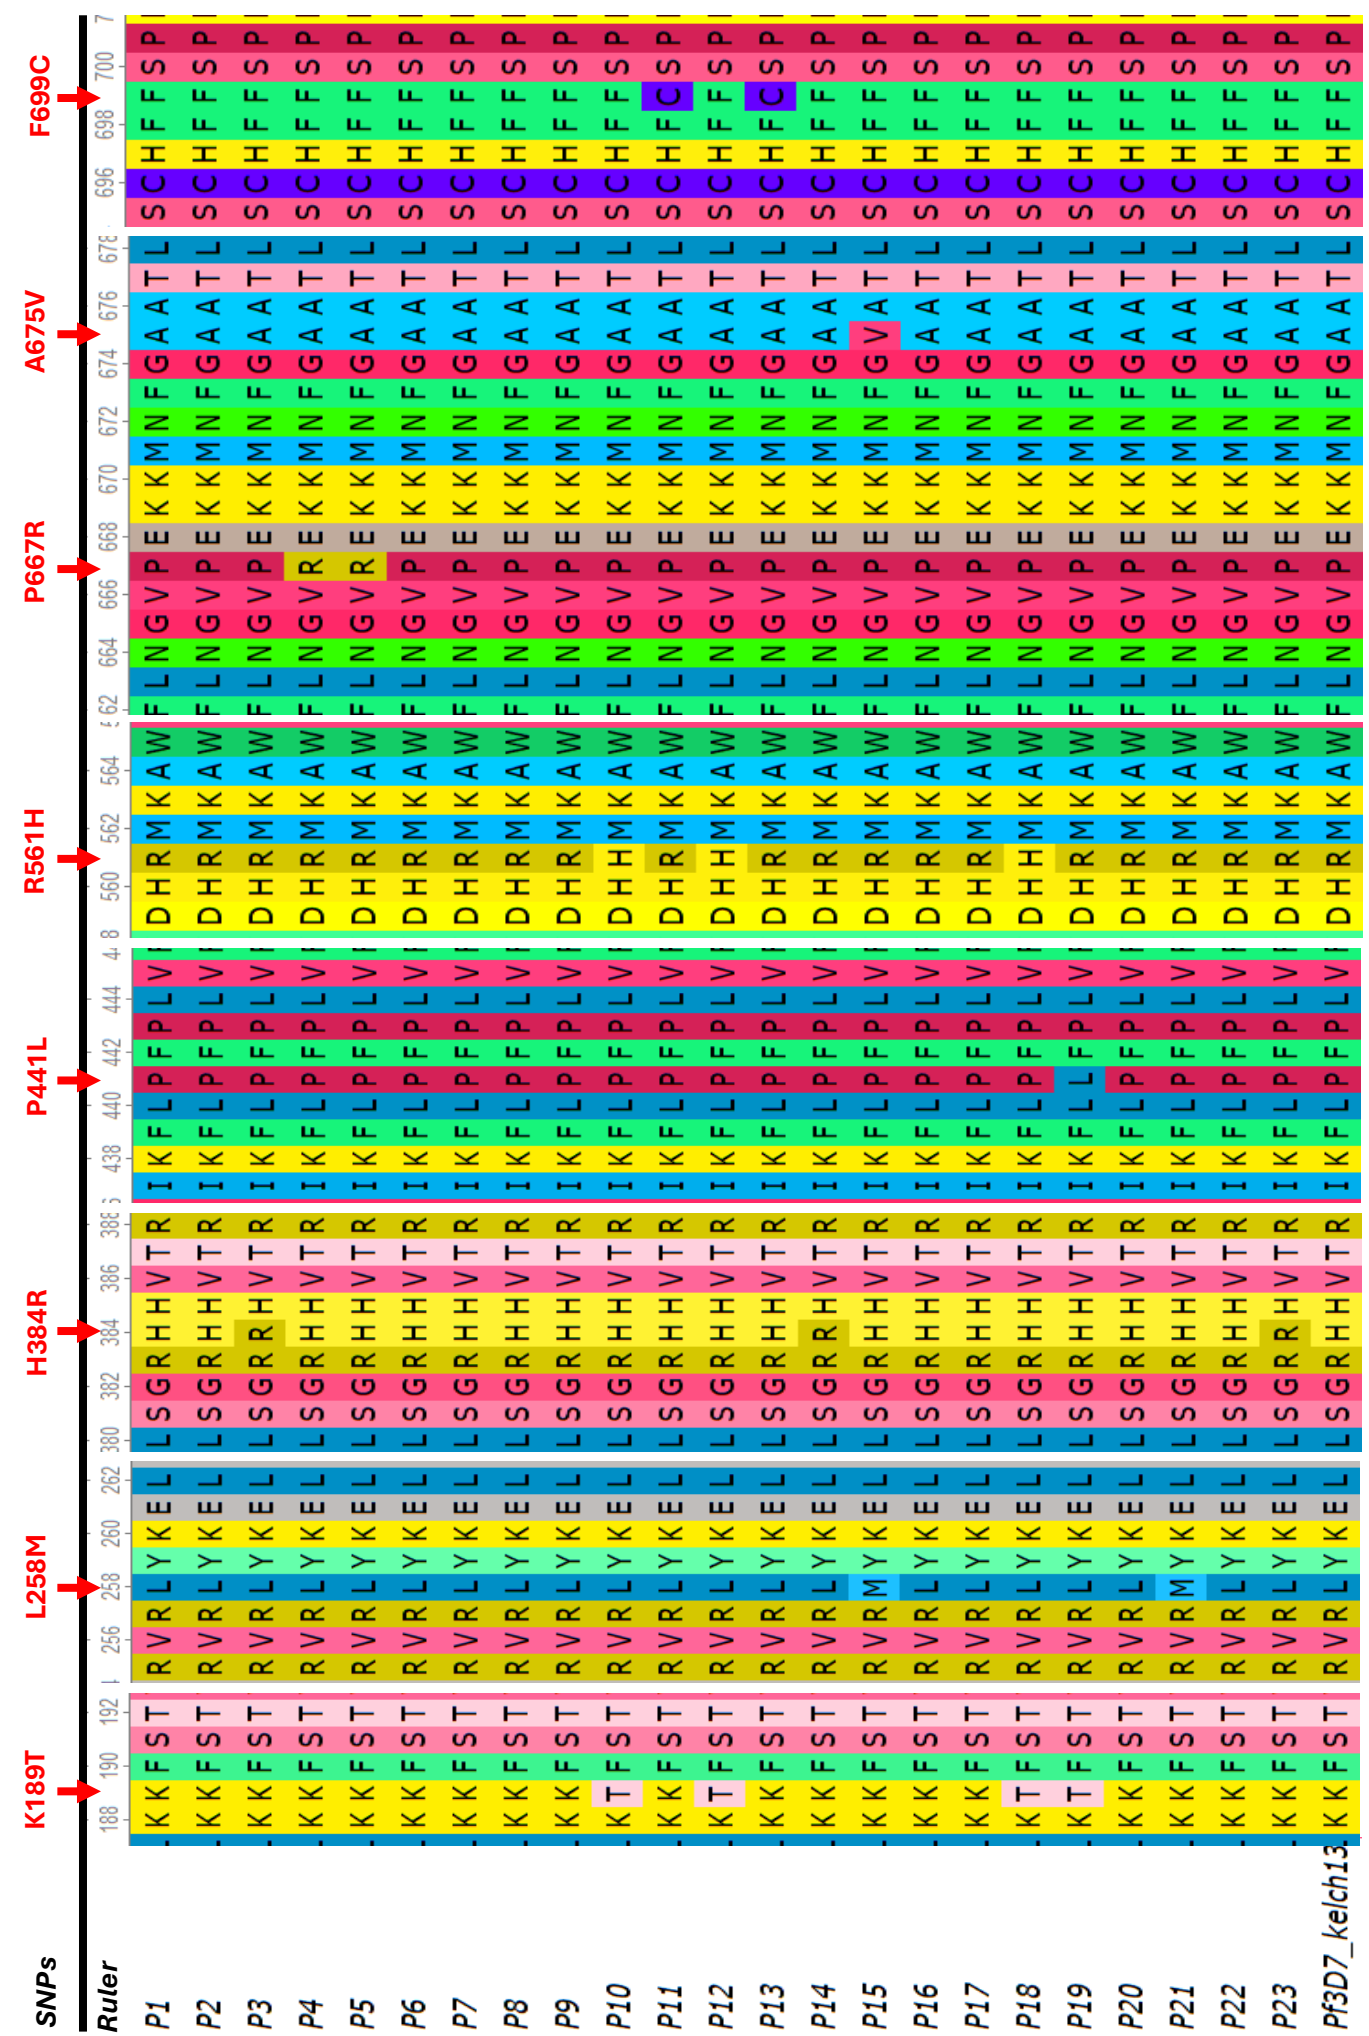

**Figure S4: Multiple sequence alignment of Kelch13 sequences.**

All 3 domains propeller Kelch 13 were assessed for SNP by Sanger sequencing using the forward primer and Eurofin genomics platform. Red arrow indicates the nucleotide position mutated in isolates with SNP in the K13PD. The alignment of the obtained sequences using PF3D7\_1343700 as reference confirmed the presence of 8 different SNPs and the corresponding amino acid substitution were as follows: K189T, L258M, H384R, P441L, R561H, P667R, A675V and F699C.



**Table S1: Docking parameters between KELCH13 H384R CULLIN-E3 ligase**

| Parameters                                    | H384 + CULLIN E3<br>(wild type interacion) | 384R + CULLIN E3<br>(mutant type interacion) |
|-----------------------------------------------|--------------------------------------------|----------------------------------------------|
| HADDOCK score                                 | -85.0 +/- 11.9                             | -71.9 +/- 7.0                                |
| Cluster size                                  | 16                                         | 15                                           |
| RMSD from the overall lowest-energy structure | 1.1 +/- 0.7                                | 23.1 +/- 0.2                                 |
| Van der Waals energy                          | -70.7 +/- 2.4                              | -64.8 +/- 6.0                                |
| Electrostatic energy                          | -405.9 +/- 12.7                            | -447.1 +/- 21.6                              |
| Desolvation energy                            | -0.5 +/- 4.3                               | 5.2 +/- 2.3                                  |
| Restraints violation energy                   | 673.0 +/- 106.7                            | 771.9 +/- 33.4                               |
| Buried Surface Area                           | 2484.6 +/- 74.2                            | 2380.8 +/- 66.3                              |
| Z-Score                                       | -1.9                                       | -1.9                                         |

**Table S2: Primer pairs used in the study**

| Gene name         | Forward primer                             | Reverse primer                            |
|-------------------|--------------------------------------------|-------------------------------------------|
| <i>18Srna</i>     | AAA GTT AAG GGA GTG AAG A                  | AAG ACT TTG ATT TCT CAT AAG G             |
| <i>MSP2</i>       | ATG AAG GTA ATT AAA ACA TTG<br>TCT ATT ATA | ATA TGG CAA AAG ATAAAA CAA<br>GTG TTG CTG |
| <i>PfS25</i>      | GAC TGT AAA TAA ACC ATG TGG<br>AGA TT      | CCG TTA CCA CAA GTT ACA TTC<br>TTA C      |
| <i>S-tRNA syn</i> | AAG TAG CAG GTC ATC GTG GTT                | TTC GGC ACA TTC TTC CAT AA                |
| <i>crt</i>        | TGT CTT GGT AAA TGT GCT CA                 | AGT TGT GAG TTT CGG ATG TT                |
| <i>mdr1</i>       | TGT GTT TGG TGT AAT ATT AAA<br>GAA CA      | ACA TAA AGT CAA ACG TGC ATT T             |
| <i>dhfr</i>       | GTT TTC GAT ATT TAT GCC ATA<br>TGT G       | TGA TAA ACA CGG AAC CTC C                 |
| <i>dhps</i>       | TTT GTT GAA CCT AAA CGT GC                 | AAC ATT TTG ATC ATT CAT GCA<br>AT         |
| <i>kelch13</i>    | GAT GCA GCA AAT CTT ATAAAT<br>GAT GAT TCT  | GCC AAG CTG CCA TTC ATT TG                |
